# Supplementary material for: On the development of the patella
Source: Oxford University Press journal article supplement (doi:10.1242/dev.121970), 2015-04-30
Supplement: dev121970supp.pdf [file dev121970supp.pdf]

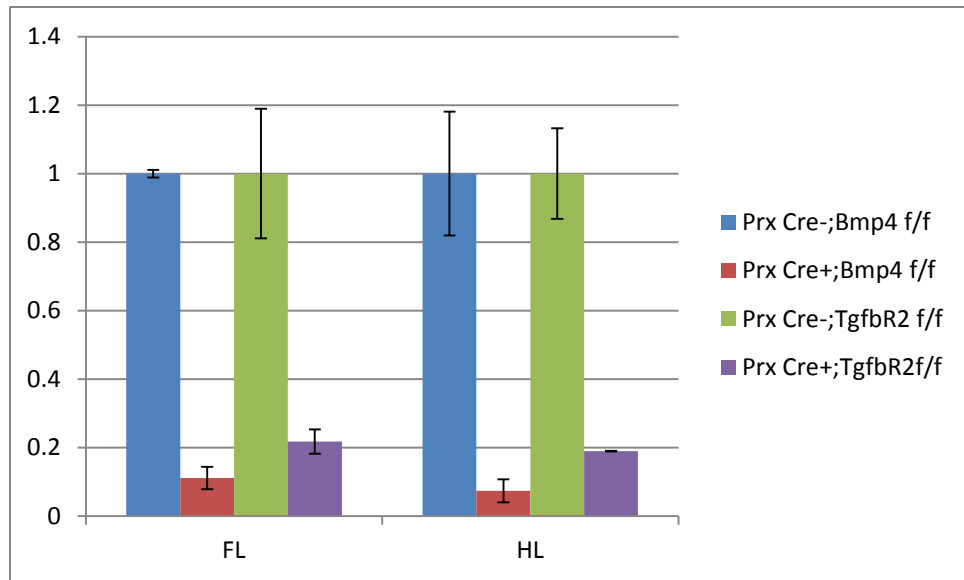

**Supplementary Figure 1. Quantitative real-time (qRT-) PCR shows a drastic decrease in expression levels of *TgfbR2* or *Bmp4* genes.** Total RNA was purified from whole limbs of E13.5 *Prx1-Cre*, *TgfbR2<sup>fl/fl</sup>* (Purple bars) and *Prx1-Cre*, *Bmp4<sup>fl/fl</sup>* (Red bars) mutants and control littermates (Green and Blue bars, respectively). Then, the efficiency of gene ablation was measured by qRT-PCR. Data was normalized to TATA-box binding protein (*Tbp*) in all cases. The results showed a drastic decrease in expression levels in the mutants, as compared with control littermates. Statistical significance was determined by Student's *t*-test as  $P < 0.05$ .

| qRT-PCR primers |                                    |                                    |
|-----------------|------------------------------------|------------------------------------|
| Gene            | Forward primer                     | Reverse primer                     |
| <i>Tbp</i>      | 5' – GCAGCCTCAGTACAGCAATCA – 3'    | 5' – GGTGCAGTGGTCAGAGTTTGA – 3'    |
| <i>TgfβR2</i>   | 5' – TCCCAAGTCGGTTAACAGTGA – 3'    | 5' – GGACTTCTGGTTGTCGCAAG – 3'     |
| <i>Bmp4</i>     | 5' – GCGAGCCATGCTAGTTTGATACCT – 3' | 5' – AGCCCAAACATCTGCAGAAGTGTC – 3' |

**Table S1.** List of primer sequences used for the qRT-PCR analysis.
